# Supplementary material
Source: PubMed Central journal article supplement (PMC3443744)
Supplement: NIHMS49733-supplement-supplementary.pdf [file NIHMS49733-supplement-supplementary.pdf]

## Supplemental Data

### Direct Observation of DNA Distortion

#### by the RSC Complex

Giuseppe Lia, Elise Praly, Helder Ferreira, Chris Stockdale, Yuk Ching Tse-Dinh, David Dunlap, Vincent Croquette, David Bensimon, and Tom Owen-Hughes

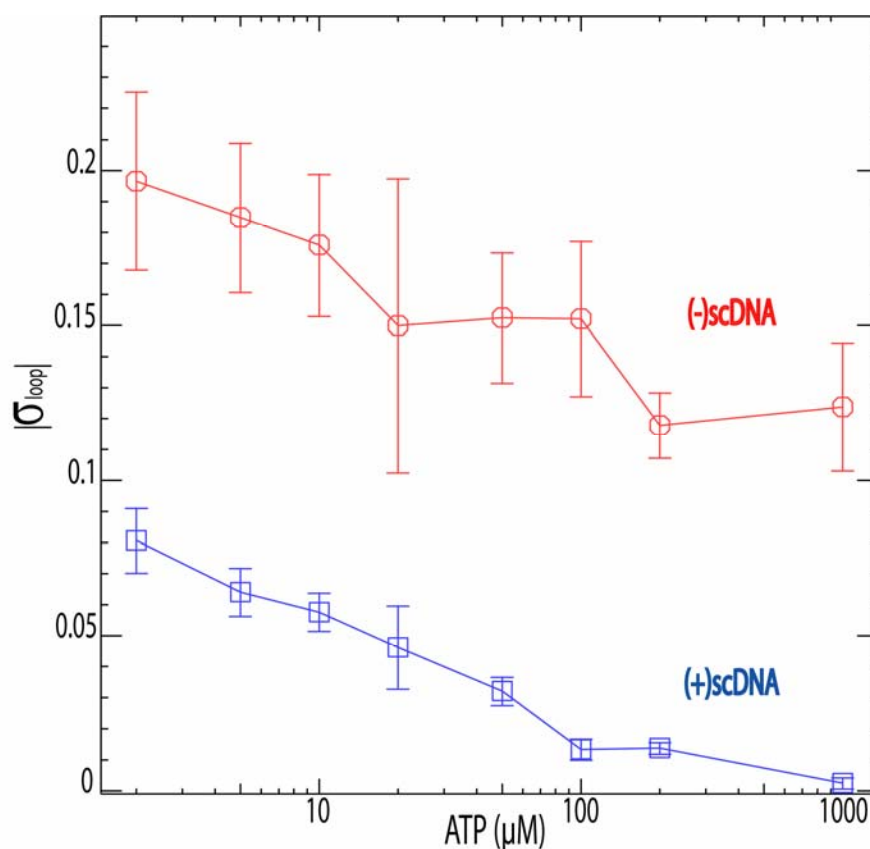

Figure S1: Supercoiling degree inside the translocated DNA loop  $|\sigma_{loop}|$  as a function of ATP on (+) or (-)scDNA, computed from the measurements of  $\delta l_n, \delta l^+$  and  $\delta l^-$ , see Fig. Error! Reference source not found. B, assuming  $l_t^\pm = \delta l_n$ , see text for details. For (-)scDNA the value displayed is an upper bound on the degree of supercoiling in the loop.

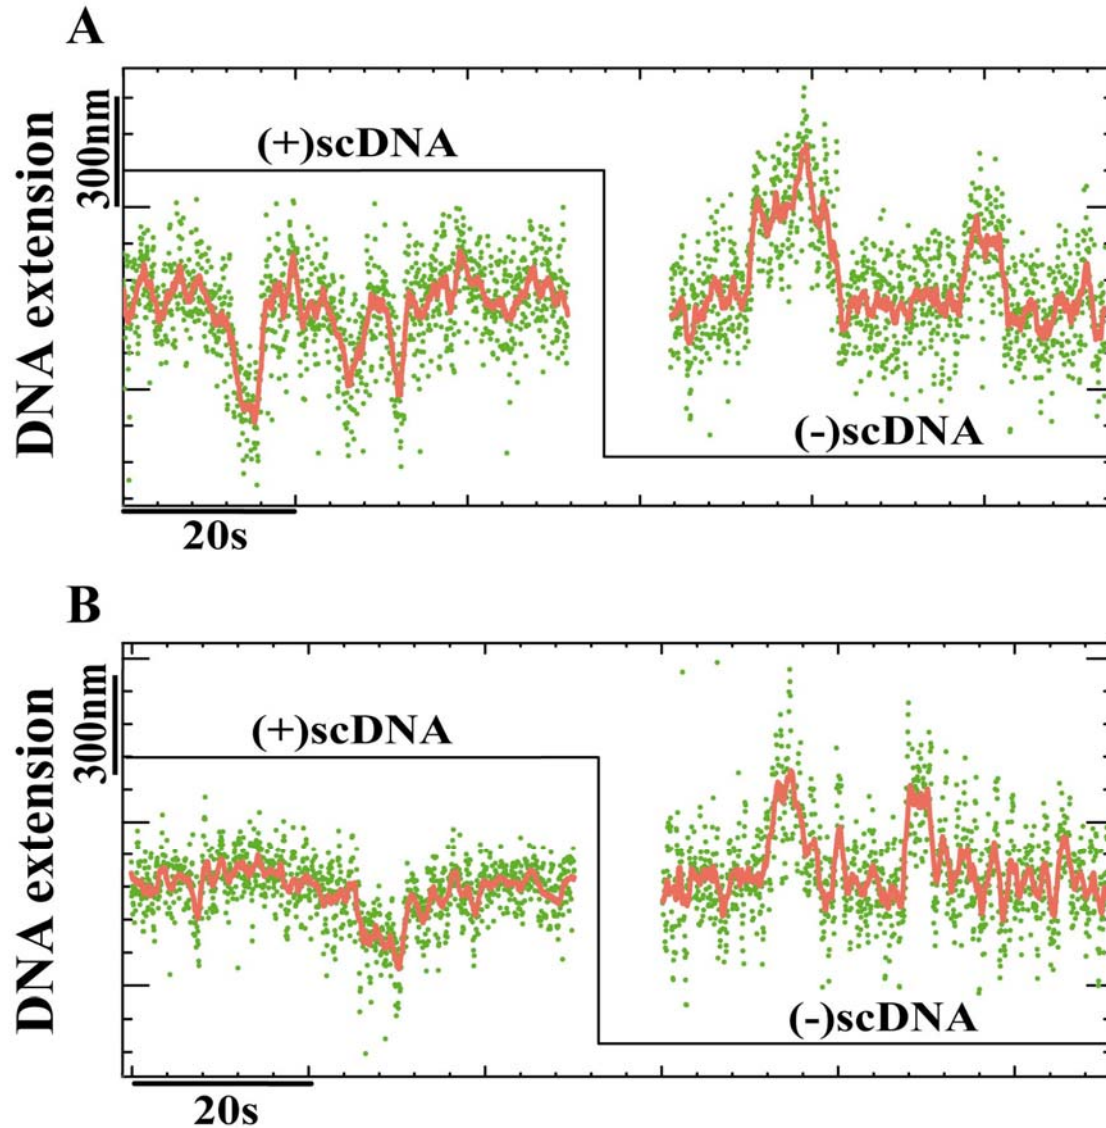

Figure S2: Transient changes in the DNA extension associated with the human SWI/SNF ATPase: (A)BRG1 and (B) hBRM. Time traces on positive and negative supercoiled DNA at  $F=0.5pN$ , in presence of  $250\mu M$  ATP for BRG1 and  $1mM$  ATP for hBRM (raw data (green), raw data averaged over 1sec. (red)). Notice the similarity of those traces to the ones observed for RSC (Fig.4A).

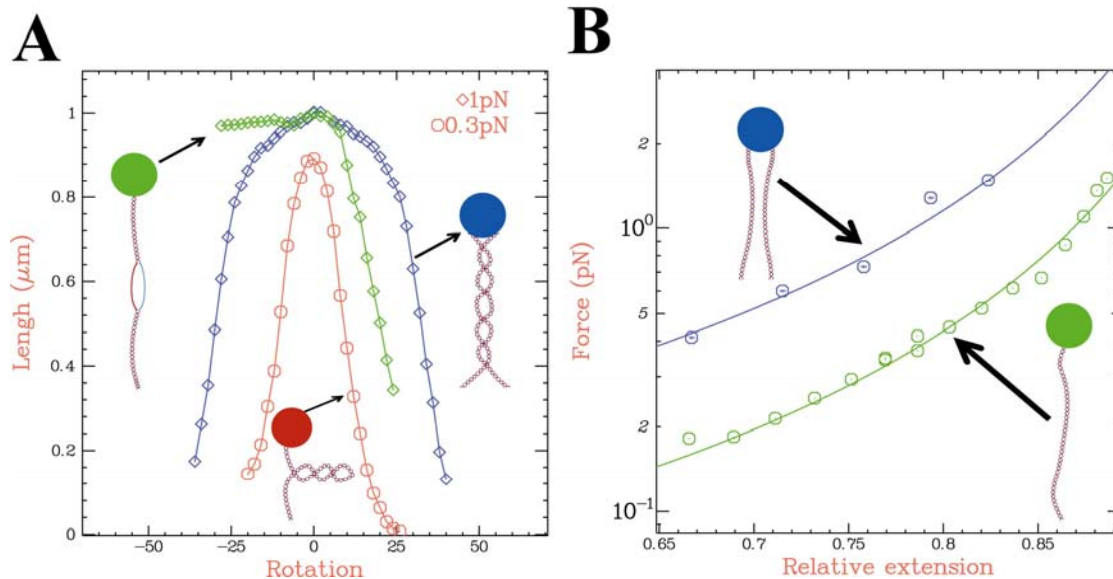

Figure S3: Variation of the DNA extension  $l$  as a function of the number  $n$  of rotations and the stretching force  $F$ . (A) When a single DNA tethers the magnetic bead to the surface, the DNA's extension is symmetric with respect to  $n \rightarrow -n$  at a low forces (red trace,  $F=0.3\text{pN}$ ) and asymmetric at high forces (green trace,  $F=1\text{pN}$ ) as a result of partial denaturation upon unwinding (i.e. for  $n < 0$ ). That is not the case when the bead is anchored by two (nicked) molecules: it is always symmetric (blue trace,  $F=2\text{pN}$ ). (B) The variation with force of the relative extension  $\zeta=l/l_0$  ( $l_0$  is the DNA contour length) is different if a bead is anchored by one or two molecules: the force required to stretch two molecules is twice the force necessary to stretch a single DNA molecule by the same amount.
